# Supplementary material
Source: PubMed Central journal article supplement (PMC8053667)
Supplement: NIHMS1623084-supplement-1.pdf [file NIHMS1623084-supplement-1.pdf]

## Table of contents

|                                                                                                                                                                                                            |    |
|------------------------------------------------------------------------------------------------------------------------------------------------------------------------------------------------------------|----|
| Supplementary Figure 1   Illustration of our developed subtyping framework .....                                                                                                                           | 2  |
| Supplementary Figure 2   PEC feature distribution ordered by subtypes for each of the four datasets .....                                                                                                  | 3  |
| Supplementary Figure 3   Baseline clinical score difference between the discovered subtypes .....                                                                                                          | 4  |
| Supplementary Figure 4   PEC difference between the two subtypes (subtype 1 vs. subtype 2, two-sample t-test with FDR correction) for unmedicated and medicated patients, respectively .....               | 5  |
| Supplementary Figure 5   Subtype PEC pattern derived by clustering on patients combining across all four datasets .....                                                                                    | 6  |
| Supplementary Figure 6   Clustering using randomly permuted PEC features across subjects .....                                                                                                             | 7  |
| Supplementary Figure 7   PEC-based clustering evaluation analysis for different independent datasets .....                                                                                                 | 8  |
| Supplementary Figure 8   Comparison of PEC patterns obtained using 26 channels that are comparable across datasets versus using all channels .....                                                         | 9  |
| Supplementary Figure 9   Subtype PEC patterns derived by clustering on healthy controls (HC) of dataset 1 .....                                                                                            | 10 |
| Supplementary Figure 10   Subtype discriminability assessed using resting-state fMRI .....                                                                                                                 | 11 |
| Supplementary Figure 11   Comparison of treatment responders between the subtypes .....                                                                                                                    | 12 |
| Supplementary Figure 12   Clustering on baseline clinical scores and typical demographic information alone for different independent datasets .....                                                        | 13 |
| Supplementary Figure 13   EMBARC CONSORT Flow Diagram for the patients included in the subtyping analyses .....                                                                                            | 14 |
| Supplementary Figure 14   Comparison of PEC estimates between using different numbers of vertices .....                                                                                                    | 15 |
| Supplementary Table 1   Difference of demographics between the two PEC-defined subtypes .....                                                                                                              | 16 |
| Supplementary Table 2   Responsiveness of EEG-connectivity subtypes to psychotherapy treatment, assessed by linear mixed models (group x time interaction) with item-level CAPS scores for dataset 2 ..... | 17 |
| Supplementary Table 3   Responsiveness of EEG-connectivity subtypes to antidepressant medication, assessed by linear mixed models (arm x time interaction) with item-level HAMD scores for dataset 3 ..... | 18 |
| Supplementary Table 4   Responsiveness of EEG-connectivity subtypes to rTMS treatment, assessed by linear mixed models (group x time interaction) with item-level BDI scores for dataset 4 .....           | 19 |
| Supplementary Table 5   Demographic characteristics and clinical variables of PTSD study dataset 1 .....                                                                                                   | 20 |
| Supplementary Table 6   Baseline demographic characteristics and clinical variables of PTSD study dataset 2 .....                                                                                          | 21 |
| Supplementary Table 7   Baseline demographic characteristics and clinical variables of depression study dataset 3 .....                                                                                    | 22 |
| Supplementary Table 8   Baseline demographic characteristics and clinical variables of depression study dataset 4 .....                                                                                    | 23 |
| Supplementary Table 9   Clinical scales used in the study .....                                                                                                                                            | 24 |
| Statement   Difference between the current findings and our prior reports .....                                                                                                                            | 25 |

**Supplementary Figure 1 | Illustration of our developed subtyping framework.** Channel-space EEG signals were first bandpass filtered into four canonical frequency bands: theta (4–7 Hz), alpha (8–12 Hz), beta (13–30 Hz), and gamma (31–50 Hz). Source localization was performed to convert the channel-space EEG into the source-space signals. Power envelope signal of each vertex was calculated based on analytical signal derived by wavelet transform and orthogonalized for all other vertices. PEC was calculated as the Pearson’s correlation coefficient between the power envelopes at each pair of vertices, followed by the Fisher’s r-to-z transformation. Regional pairwise PEC features were further extracted by averaging PEC values over all corresponding vertex pairs. Sparse clustering was then employed to achieve a data-driven approach to explore the potentially important PEC biomarkers for discovering neurophysiological subtypes.

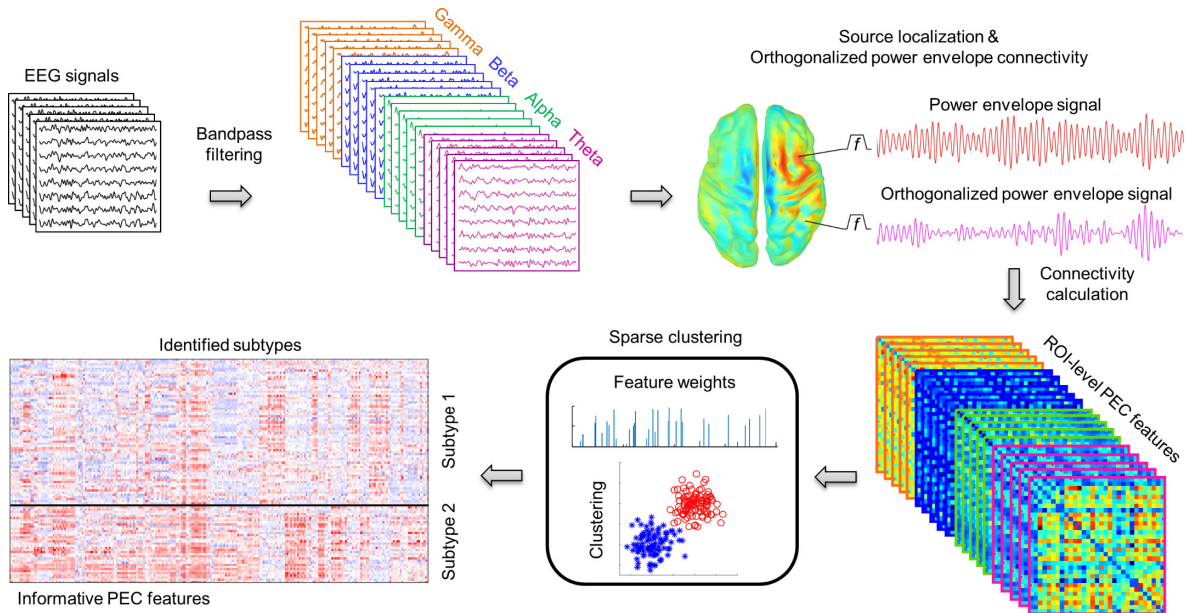

**Supplementary Figure 2 | PEC feature distribution ordered by subtypes for each of the four datasets.**  
The PEC difference between the subtypes is also visualized on the surface with  $t$  values obtained by two-sample  $t$ -test (subtype 1 versus subtype 2). The regional  $t$ -value was averaged for each ROI across all ROIs.

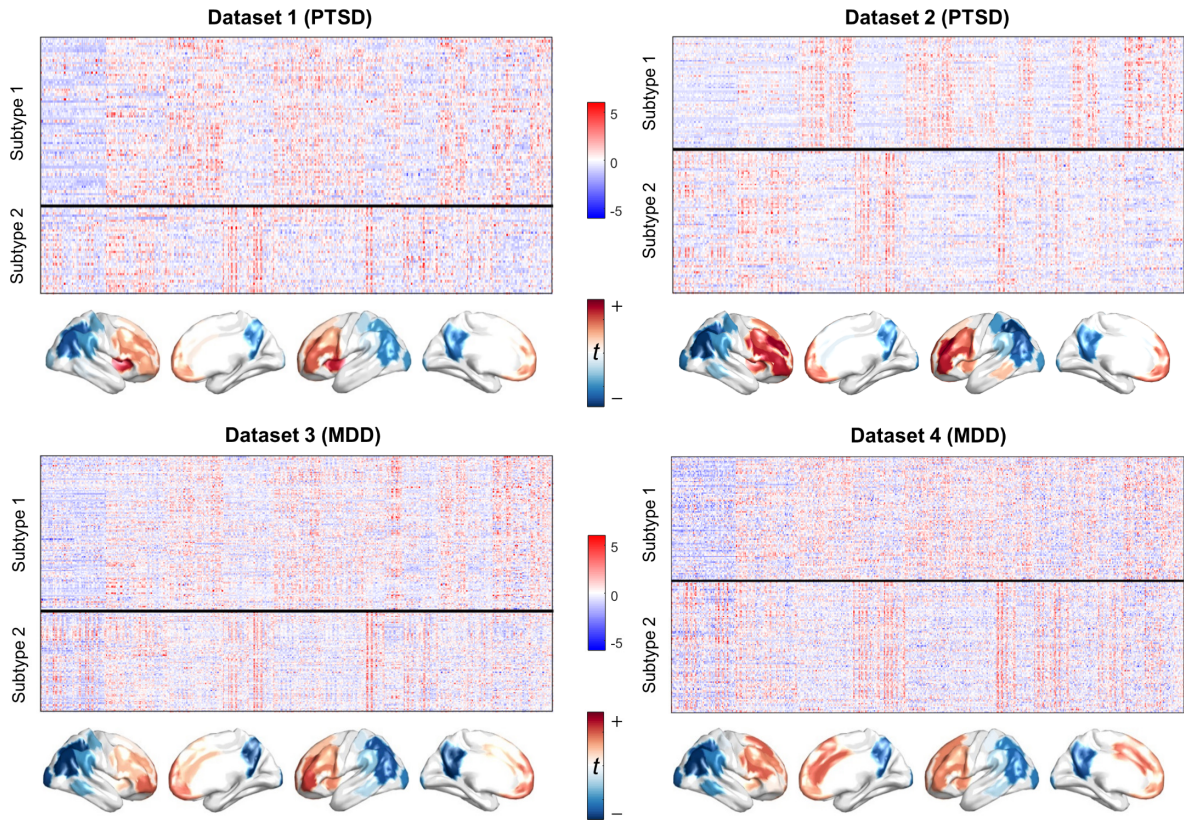

**Supplementary Figure 3 | Baseline clinical score difference between the discovered subtypes.** No significant difference (FDR corrected) in baseline clinical scores was found between the two subtypes. CAPS = Clinician-administered PTSD Scale, WHOQOL = World Health Organization Quality-of-life Scale, BDI = Beck Depression Inventory, HAMD = Hamilton Depression Rating Scale, QIDS = Quick Inventory of Depressive Symptomatology, MASQ = Mood and Anxiety Symptoms Questionnaire, DASS = Depression, Anxiety and Stress Scale. All error bars represent the standard deviation and NS denotes not significant.

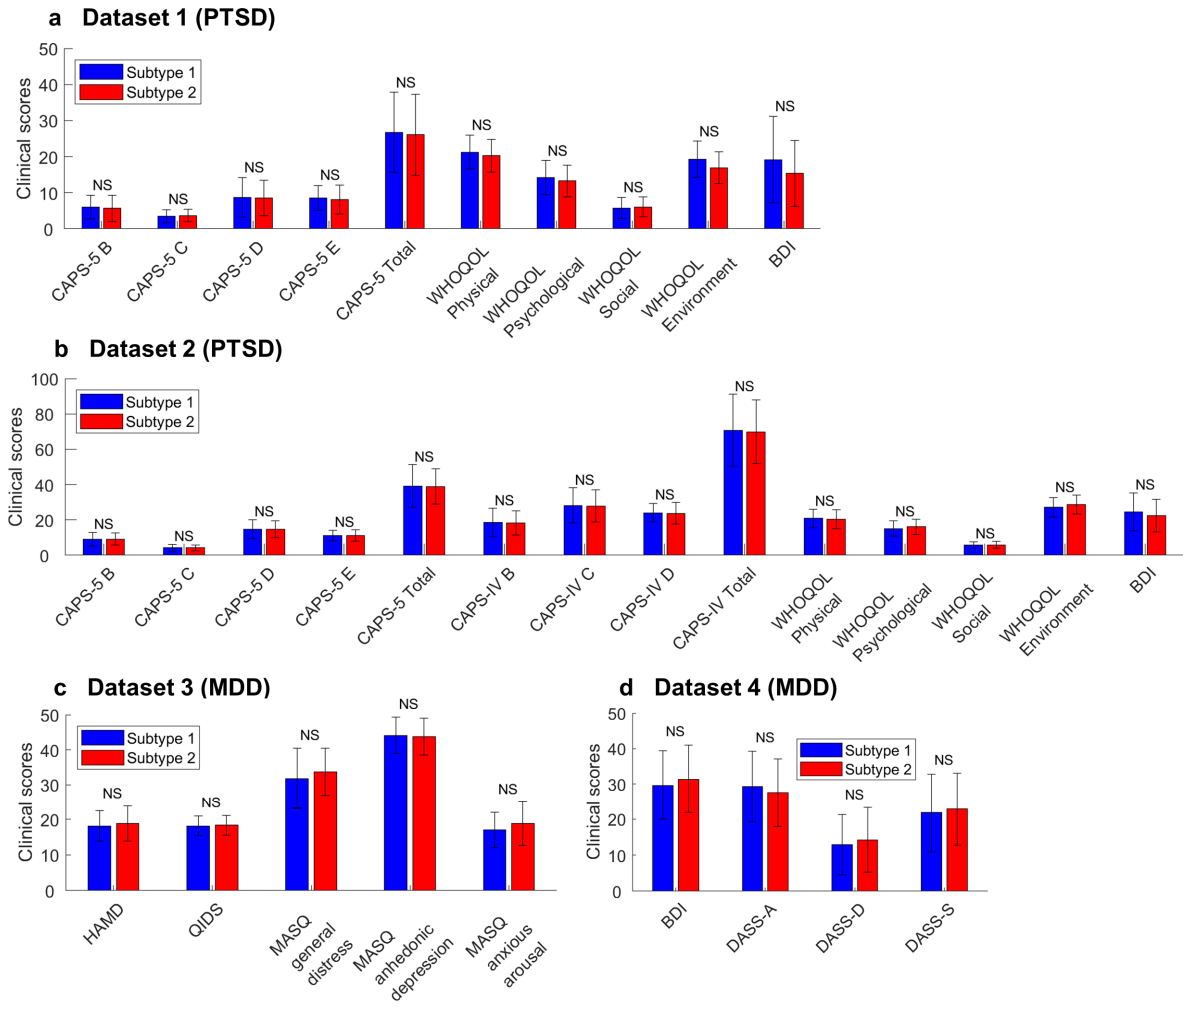

**Supplementary Figure 4 | PEC difference between the two subtypes (subtype 1 vs. subtype 2, two-sample t-test with FDR correction) for unmedicated and medicated patients, respectively.**

**Dataset 1**

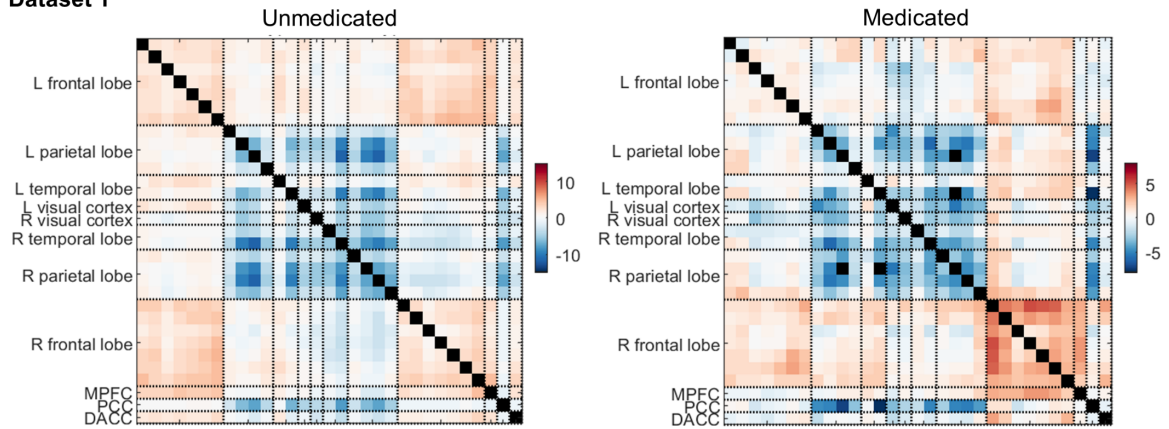

**Dataset 2**

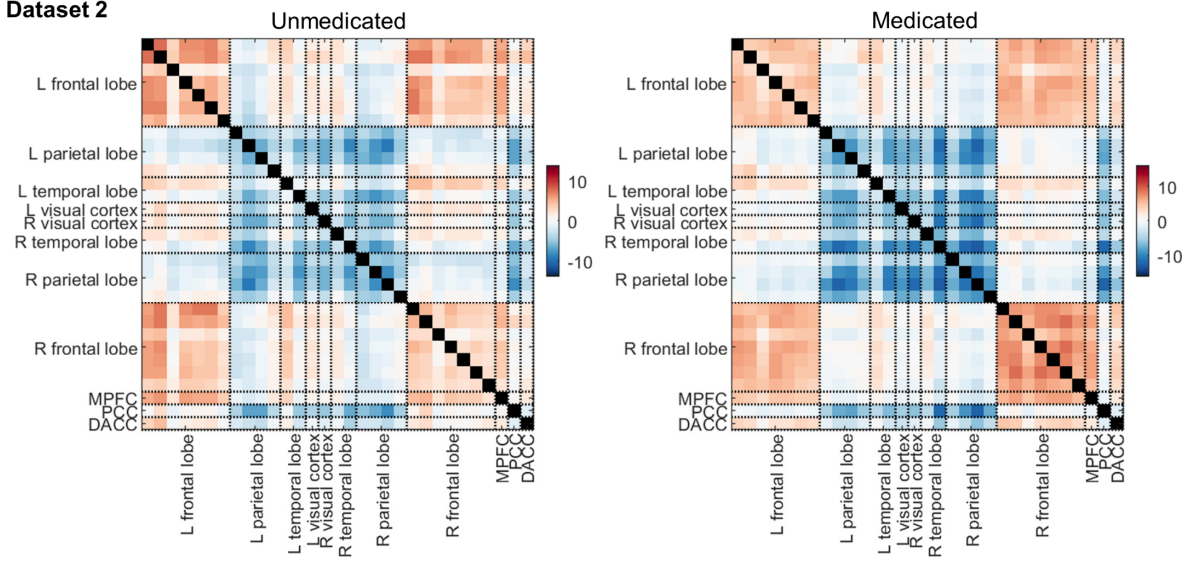

Supplementary Figure 5 | Subtype PEC pattern derived by clustering on patients combining across all four datasets.

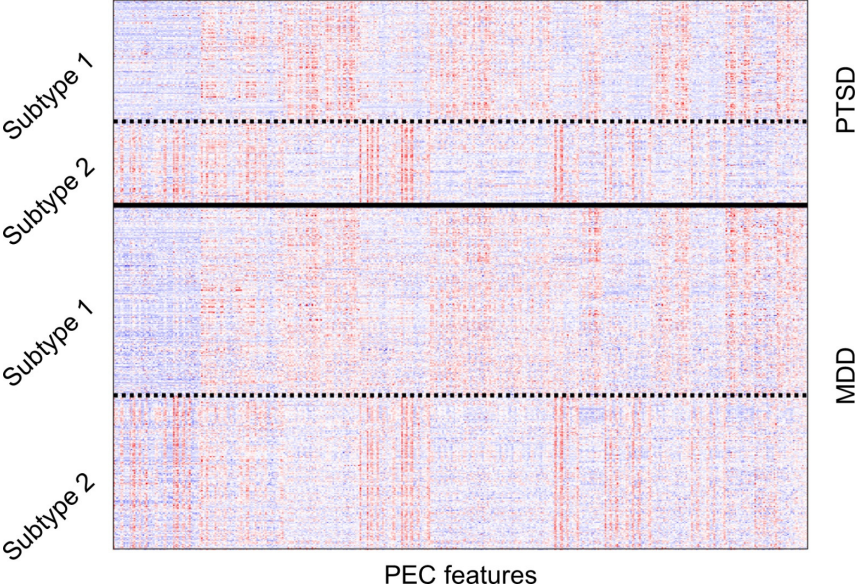

**Supplementary Figure 6 | Clustering using randomly permuted PEC features across subjects. a,** Gap criterion values in using different numbers of clusters. **b,** Feature patterns obtained by clustering with two clusters on randomly permuted PEC features.

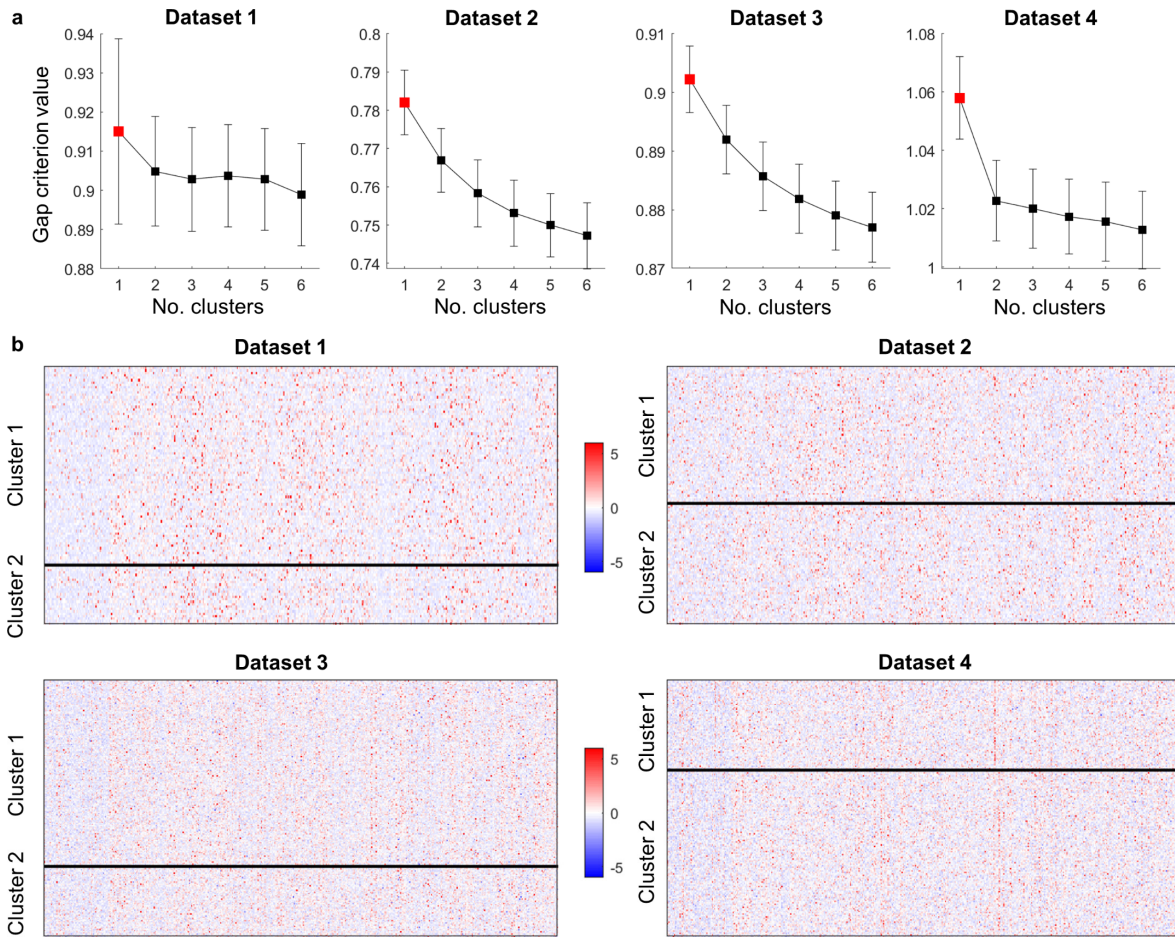

**Supplementary Figure 7 | PEC-based clustering evaluation analysis for different independent datasets.** **a**, Gap statistic criterion values in using different numbers of clusters (The best criterion values are marked in red). **b**, Variance ratios in using different numbers of clusters based Calinski-Harabasz criterion (The best criterion values are marked in red). **c**, Cluster assignment stability evaluated by repeating clustering 100 times by randomly leaving 10% subjects out. **d**, Cluster assignment stability in using different numbers of clusters. All error bars indicate standard deviation.

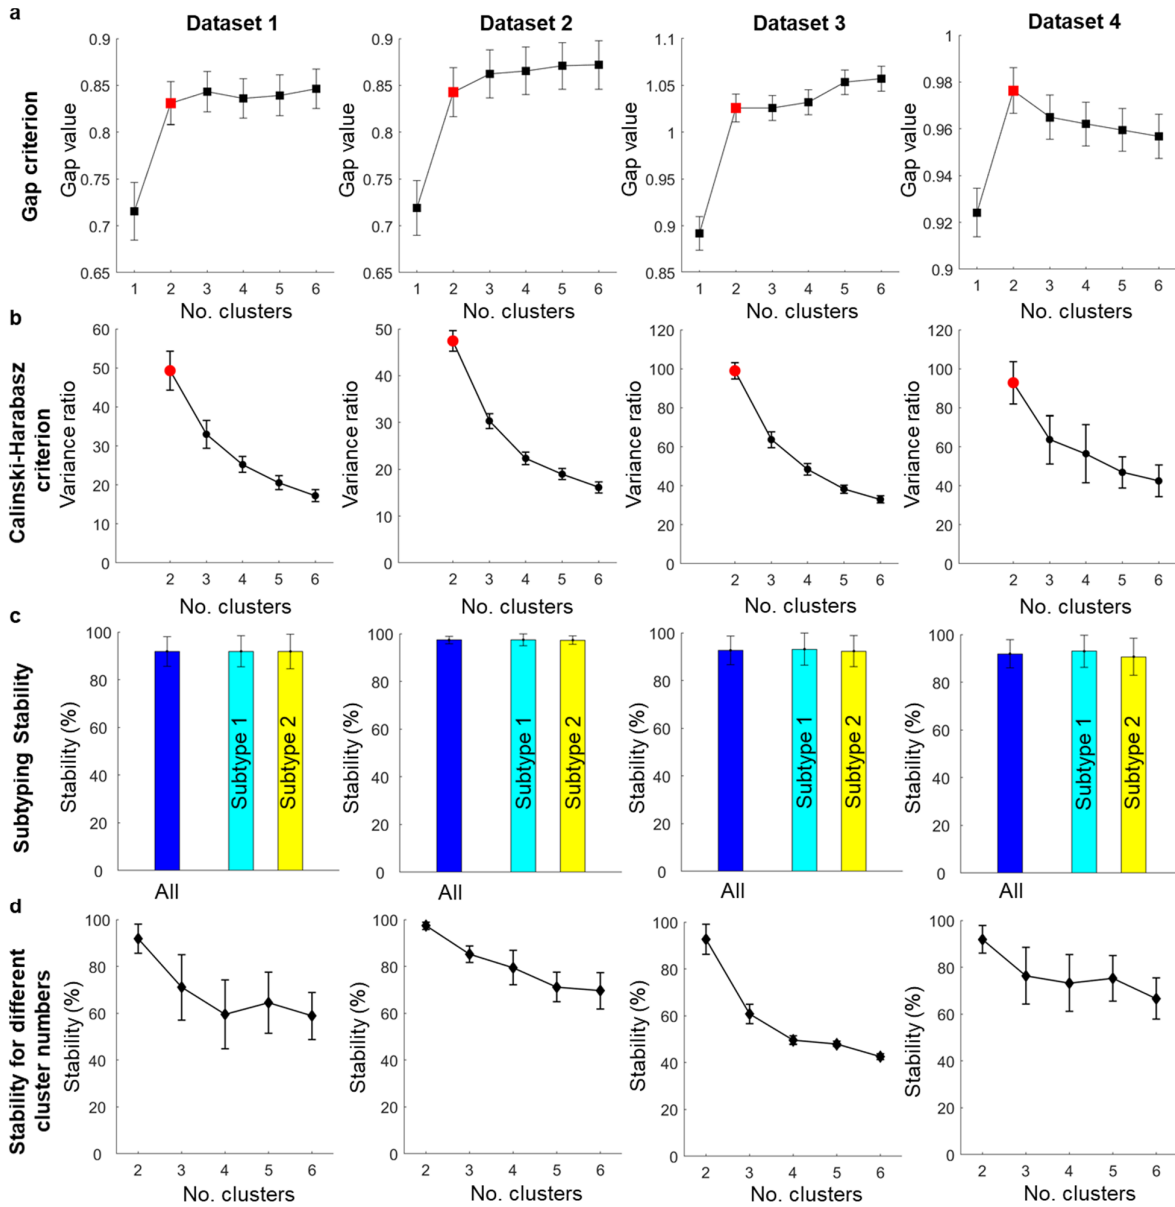



**Supplementary Figure 8 | Comparison of PEC patterns obtained using 26 channels that are comparable across datasets versus using all channels. a, Channel montages.** For dataset 1 - 3, the channel montages show the downsampled 26 channels that are most close to those of dataset 4. **b, PEC differences (two-sample t-test with FDR correction) between the two subtypes derived from dataset 1 – 3 for using all channels and the downsampled 26 channels, respectively.**

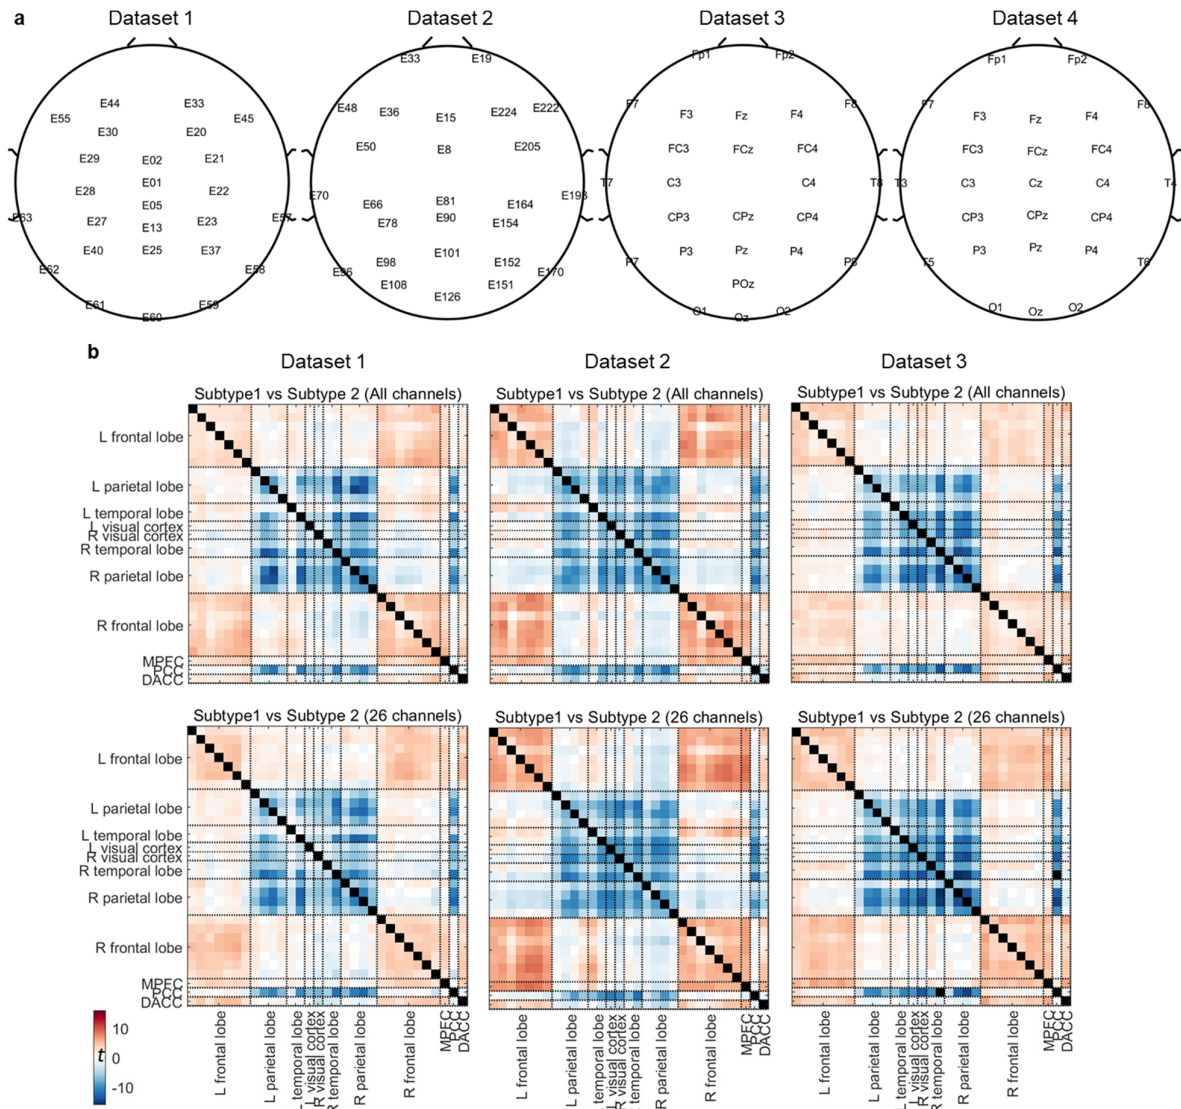

**Supplementary Figure 9 | Subtype PEC patterns derived by clustering on healthy controls (HC) of dataset 1. a**, PEC difference (two-sample t-test with FDR correction) between the two identified subtypes. **b**, Mean PEC matrices for all HCs, subtype 1, and subtype 2, respectively. **c**, Clustering stability assessed on PTSD and HC groups, respectively. The subtype stability of healthy controls (80.1%) was significantly lower (Wilcoxon rank sum statistical test:  $z=2.3$ ,  $p=0.02$ ) than that of PTSD (91.9%) as well as more variable (coefficient of variation in healthy controls: 16.0, and in patients: 6.2). The error bars indicate standard deviation.

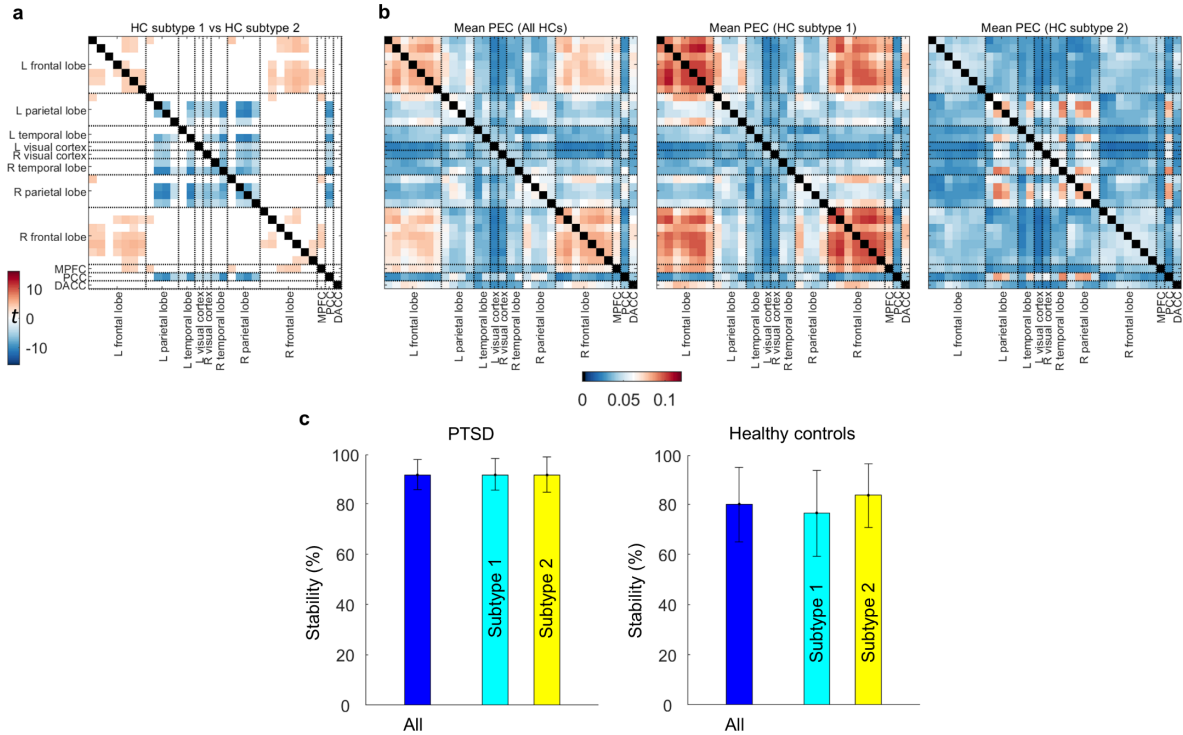

**Supplementary Figure 10 | Subtype discriminability assessed using resting-state fMRI.** A linear classifier was trained using a relevance vector machine<sup>1,2</sup> with pooled resting-state fMRI data to distinguish the two EEG-connectivity defined subtypes. Classification performance was evaluated using a 10x10 fold cross-validation. **a**, Our classifier with rsfMRI connectivity features was able to distinguish the two EEG-connectivity defined subtypes with an accuracy of 83.9% (permutation test,  $p < 0.0001$ ), a sensitivity of 85.7% in detecting subtype1 and 81.2% in detecting subtype 2. The error bars indicate standard deviation. **b**, The most discriminative features involved regions of FPCN, VAN, and visual network. **c**, Overlapping connections between EEG PEC and fMRI connectivity classifier profiles in distinguishing the two EEG subtypes.

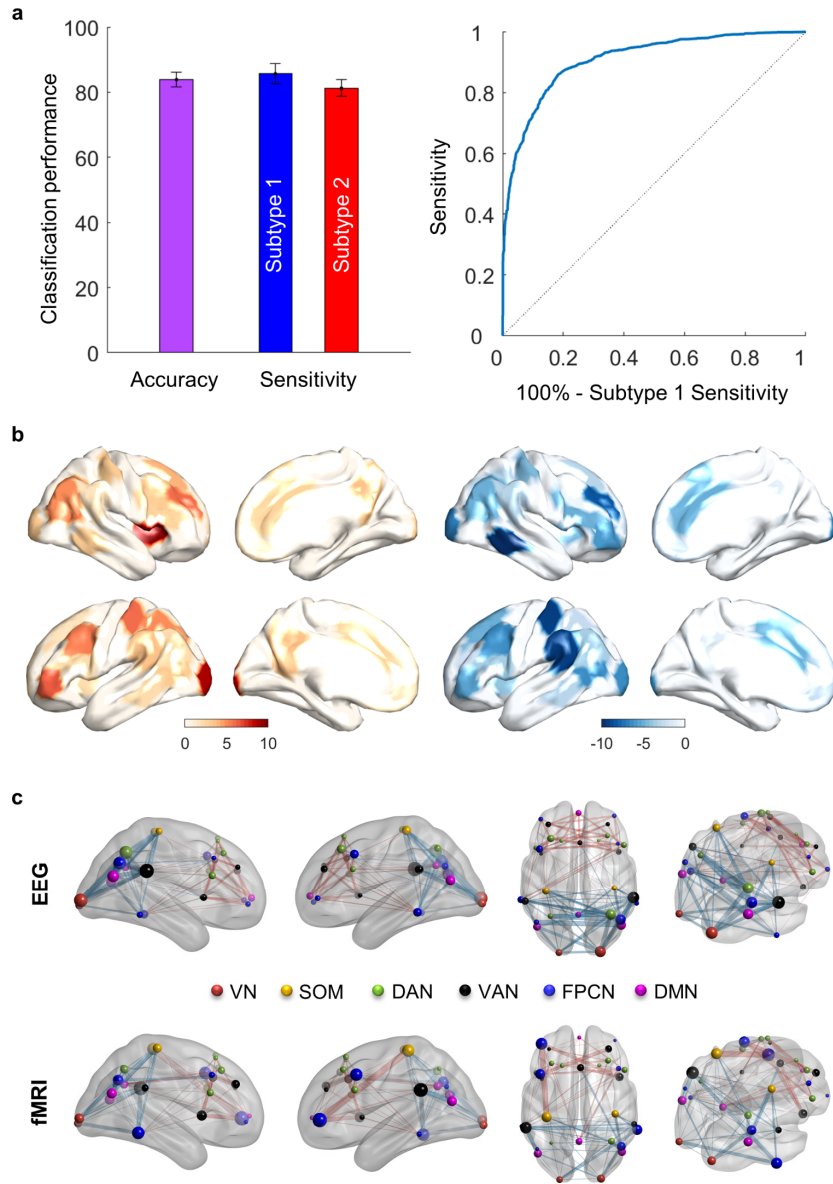

**Supplementary Figure 11 | Comparison of treatment responders between the subtypes.** Subtype 1 included significantly more responders than those in subtype 2 for both psychotherapy **a** and antidepressant medication **b**. Here, a 30% pre minus post treatment symptom change was used as the cutoff to identify responders in dataset 2 (PTSD) while a 50% change was used as the cutoff in dataset 3 (MDD). **c**, For completeness, we also show the results if using a 50% symptom change cutoff for defining treatment response in PTSD (i.e. to match that used for MDD).

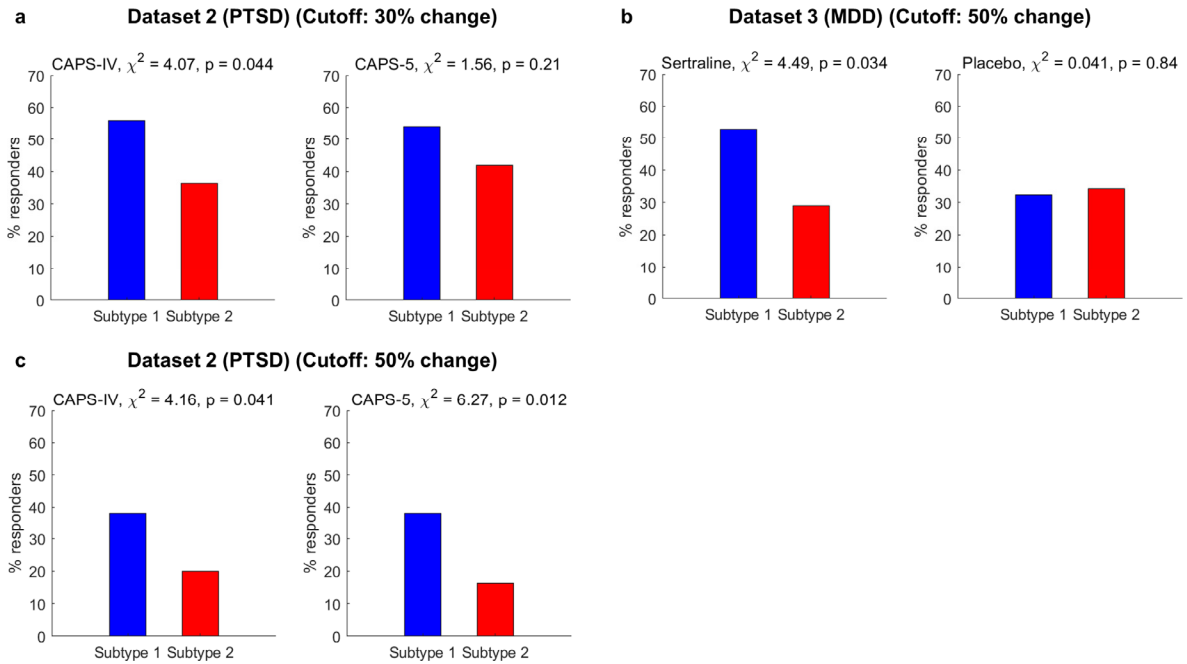

**Supplementary Figure 12 | Clustering on baseline clinical scores and typical demographic information alone for different independent datasets.** **a**, Gap values calculated using gap statistic criterion using different numbers of clusters for each of the four datasets. The error bars indicate standard deviation. **b**, Clinical subtypes identified for dataset 1 and dataset 4, respectively. CAPS = Clinician-administered PTSD Scale, WHOQOL = World Health Organization Quality-of-life Scale, BDI = Beck Depression Inventory, HAMD = Hamilton Depression Rating Scale, QIDS = Quick Inventory of Depressive Symptomatology, MASQ = Mood and Anxiety Symptoms Questionnaire, DASS = Depression, Anxiety and Stress Scale. Demographic variables included age, gender, and years of education.

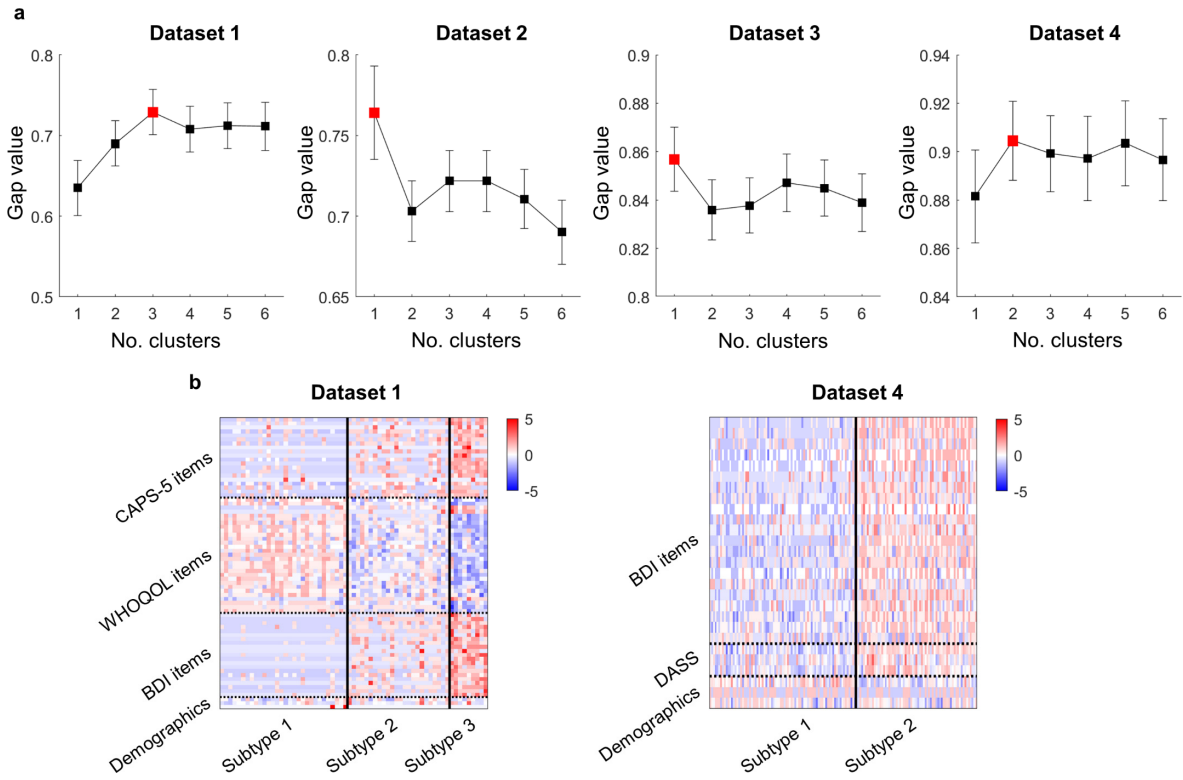

**Supplementary Figure 13 | EMBARC CONSORT Flow Diagram for the patients included in the subtyping analyses.** For this analysis, patients were included (1) regardless of their HAMD<sub>17</sub> score, and (2) if they had resting-state EEG data of sufficient quality.

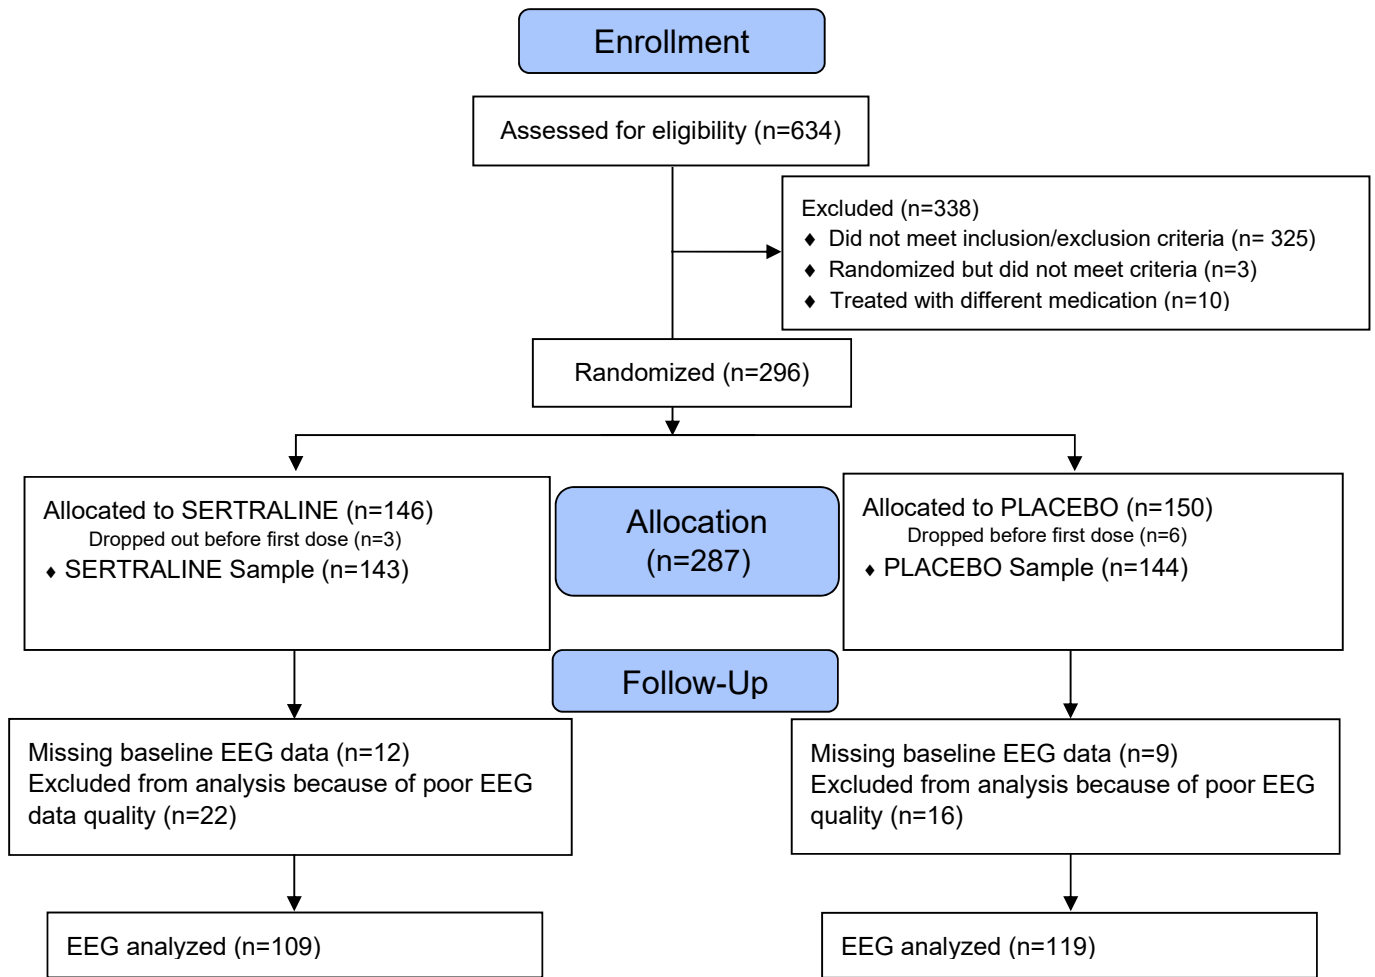

**Supplementary Figure 14 | Comparison of PEC estimates between using different numbers of vertices.** **a**, ROI-level PEC comparison between using 3003 vertices versus 15003 vertices for ten typical subjects. **b**, ROI-level mean PEC comparison between using 3003 vertices and 15003 vertices for all patients, subtype 1, and subtype 2, respectively.

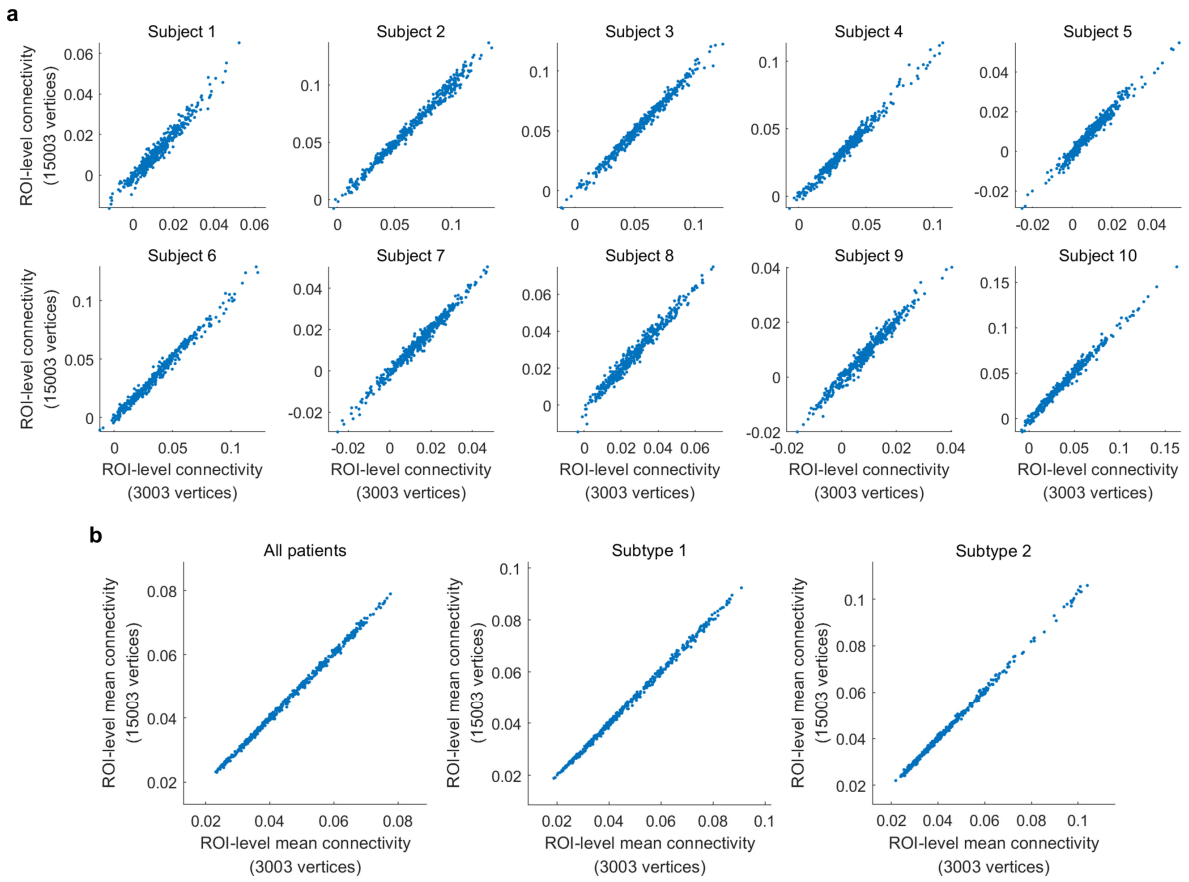

**Supplementary Table 1 | Difference of demographics between the two PEC-defined subtypes.**

| <b>Dataset 1 (PTSD)</b>         |                        |                        |                      |         |
|---------------------------------|------------------------|------------------------|----------------------|---------|
|                                 | Subtype 1<br>(N = 69)  | Subtype 2<br>(N = 37)  | X <sup>2</sup> value | p value |
| Categorical variables           |                        |                        |                      |         |
| Males, No. (%)                  | 66 (95.7)              | 30 (81.1)              | 5.99                 | 0.014   |
| Continuous variables, mean (SD) |                        |                        |                      |         |
| Age, yr                         | 34.8 (7.6)             | 32.8 (7.7)             | 1.28                 | 0.20    |
| Educational attainment, yr      | 15.6 (2.2)             | 14.9 (2.3)             | 1.54                 | 0.13    |
| <b>Dataset 2 (PTSD)</b>         |                        |                        |                      |         |
|                                 | Subtype 1<br>(N = 64)  | Subtype 2<br>(N = 71)  | X <sup>2</sup> value | p value |
| Categorical variables           |                        |                        |                      |         |
| Males, No. (%)                  | 55 (85.9)              | 57 (80.3)              | 0.76                 | 0.38    |
| Continuous variables, mean (SD) |                        |                        |                      |         |
| Age, yr                         | 46.2 (14.2)            | 44.1 (12.6)            | 0.91                 | 0.36    |
| Educational attainment, yr      | 15.0 (1.8)             | 14.8 (1.7)             | 0.56                 | 0.57    |
| <b>Dataset 3 (MDD)</b>          |                        |                        |                      |         |
|                                 | Subtype 1<br>(N = 137) | Subtype 2<br>(N = 91)  | X <sup>2</sup> value | p value |
| Categorical variables           |                        |                        |                      |         |
| Males, No. (%)                  | 50 (36.5)              | 28 (30.8)              | 0.80                 | 0.37    |
| Continuous variables, mean (SD) |                        |                        |                      |         |
| Age, yr                         | 39.0 (13.0)            | 35.9 (13.4)            | 1.76                 | 0.080   |
| Educational attainment, yr      | 15.4 (2.5)             | 15.0 (2.6)             | 1.18                 | 0.24    |
| <b>Dataset 4 (MDD)</b>          |                        |                        |                      |         |
|                                 | Subtype 1<br>(N = 86)  | Subtype 2<br>(N = 93)  | X <sup>2</sup> value | p value |
| Categorical variables           |                        |                        |                      |         |
| Males, No. (%)                  | 25 (29.1)              | 64 (68.8)              | 28.2                 | <0.0001 |
| Continuous variables, mean (SD) |                        |                        |                      |         |
| Age, yr                         | 42.9 (13.0)            | 43.7 (13.1)            | -0.38                | 0.70    |
| Educational attainment, yr      | 13.7 (4.1)             | 14.5 (3.8)             | -1.43                | 0.15    |
| <b>All datasets</b>             |                        |                        |                      |         |
|                                 | Subtype 1<br>(N = 356) | Subtype 2<br>(N = 292) | X <sup>2</sup> value | p value |
| Categorical variables           |                        |                        |                      |         |
| Males, No. (%)                  | 196 (55.1)             | 179 (61.3)             | 2.57                 | 0.11    |
| Continuous variables, mean (SD) |                        |                        |                      |         |
| Age, yr                         | 40.4 (12.9)            | 40.0 (13.3)            | 0.45                 | 0.65    |
| Educational attainment, yr      | 14.9 (2.9)             | 14.8 (2.8)             | 0.73                 | 0.47    |



**Supplementary Table 2 | Responsiveness of EEG-connectivity subtypes to psychotherapy treatment, assessed by linear mixed models (group x time interaction) with item-level CAPS scores for dataset 2.**

| CAPS items | All Patients |         | PE      |         | CPT     |         |
|------------|--------------|---------|---------|---------|---------|---------|
|            | F value      | p value | F value | p value | F value | p value |
| CAPS-IV B1 | 3.55         | 0.061   | 3.55    | 0.063   | 0.85    | 0.36    |
| CAPS-IV B2 | 6.45         | 0.011   | 4.93    | 0.029   | 2.36    | 0.13    |
| CAPS-IV B3 | 1.49         | 0.22    | 0.069   | 0.79    | 1.46    | 0.23    |
| CAPS-IV B4 | 2.33         | 0.13    | 2.72    | 0.10    | 0.40    | 0.53    |
| CAPS-IV B5 | 0.87         | 0.35    | 8.88    | 0.0039  | 0.32    | 0.57    |
| CAPS-IV C1 | 0.82         | 0.37    | 0.51    | 0.48    | 0.52    | 0.47    |
| CAPS-IV C2 | 7.02         | 0.0086  | 2.81    | 0.098   | 4.48    | 0.036   |
| CAPS-IV C3 | 0.55         | 0.46    | 0.49    | 0.49    | 0.17    | 0.68    |
| CAPS-IV C4 | 7.06         | 0.0084  | 2.58    | 0.11    | 4.78    | 0.030   |
| CAPS-IV C5 | 2.80         | 0.095   | 0.53    | 0.47    | 2.02    | 0.16    |
| CAPS-IV C6 | 4.21         | 0.041   | 1.27    | 0.26    | 2.62    | 0.11    |
| CAPS-IV C7 | 0.12         | 0.73    | 0.016   | 0.90    | 0.15    | 0.70    |
| CAPS-IV D1 | 1.63         | 0.20    | 0.78    | 0.38    | 1.06    | 0.30    |
| CAPS-IV D2 | 2.66         | 0.10    | 2.41    | 0.12    | 0.74    | 0.39    |
| CAPS-IV D3 | 10.02        | 0.0017  | 7.40    | 0.0081  | 5.76    | 0.018   |
| CAPS-IV D4 | 2.07         | 0.15    | 4.17    | 0.045   | 0.17    | 0.68    |
| CAPS-IV D5 | 0.33         | 0.57    | 1.09    | 0.30    | 1.27    | 0.26    |
| CAPS-5 B1  | 3.40         | 0.067   | 5.68    | 0.020   | 0.50    | 0.48    |
| CAPS-5 B2  | 4.58         | 0.033   | 4.64    | 0.035   | 1.53    | 0.22    |
| CAPS-5 B3  | 0.30         | 0.59    | 0.00007 | 0.99    | 0.30    | 0.58    |
| CAPS-5 B4  | 0.34         | 0.56    | 2.51    | 0.12    | 0.24    | 0.62    |
| CAPS-5 B5  | 0.93         | 0.33    | 12.18   | 0.00081 | 0.80    | 0.37    |
| CAPS-5 C1  | 0.31         | 0.58    | 0.99    | 0.32    | 0.054   | 0.82    |
| CAPS-5 C2  | 9.07         | 0.0029  | 3.60    | 0.062   | 6.07    | 0.015   |
| CAPS-5 D1  | 0.31         | 0.58    | 0.31    | 0.58    | 0.12    | 0.73    |
| CAPS-5 D2  | 0.10         | 0.75    | 2.40    | 0.13    | 0.35    | 0.56    |
| CAPS-5 D3  | 1.07         | 0.30    | 0.23    | 0.63    | 0.99    | 0.32    |
| CAPS-5 D4  | 3.23         | 0.073   | 7.07    | 0.0096  | 0.055   | 0.81    |
| CAPS-5 D5  | 8.17         | 0.0046  | 3.81    | 0.055   | 5.06    | 0.026   |
| CAPS-5 D6  | 2.39         | 0.12    | 0.39    | 0.54    | 1.90    | 0.17    |
| CAPS-5 D7  | 3.81         | 0.052   | 0.76    | 0.39    | 2.68    | 0.10    |
| CAPS-5 E1  | 2.52         | 0.11    | 4.60    | 0.035   | 0.089   | 0.77    |
| CAPS-5 E2  | 0.41         | 0.52    | 1.17    | 0.28    | 0.051   | 0.82    |
| CAPS-5 E3  | 0.24         | 0.63    | 1.72    | 0.19    | 0.061   | 0.81    |
| CAPS-5 E4  | 1.31         | 0.25    | 0.076   | 0.78    | 2.24    | 0.14    |
| CAPS-5 E5  | 6.99         | 0.0088  | 6.76    | 0.011   | 3.31    | 0.071   |
| CAPS-5 E6  | 0.22         | 0.64    | 0.18    | 0.68    | 0.22    | 0.64    |

**Supplementary Table 3 | Responsiveness of EEG-connectivity subtypes to antidepressant medication, assessed by linear mixed models (arm x time interaction) with item-level HAMD scores for dataset 3.**

| HAMD items | Subtype 1 |         | Subtype 2 |         |
|------------|-----------|---------|-----------|---------|
|            | F value   | p value | F value   | p value |
| HAMD-1     | 8.56      | 0.0035  | 1.01      | 0.32    |
| HAMD-2     | 12.12     | <0.001  | 0.32      | 0.57    |
| HAMD-3     | 7.65      | 0.0058  | 0.22      | 0.64    |
| HAMD-4     | 1.19      | 0.28    | 1.01      | 0.32    |
| HAMD-5     | 4.91      | 0.027   | 0.00013   | 0.99    |
| HAMD-6     | 0.29      | 0.59    | 0.00072   | 0.98    |
| HAMD-7     | 0.13      | 0.72    | 7.19      | 0.0076  |
| HAMD-8     | 4.10      | 0.043   | 0.26      | 0.61    |
| HAMD-9     | 0.74      | 0.39    | 1.43      | 0.23    |
| HAMD-10    | 0.47      | 0.49    | 1.09      | 0.30    |
| HAMD-11    | 0.68      | 0.41    | 0.0057    | 0.94    |
| HAMD-12    | 3.70      | 0.055   | 0.011     | 0.92    |
| HAMD-13    | 2.23      | 0.14    | 0.18      | 0.67    |
| HAMD-14    | 0.30      | 0.58    | 0.030     | 0.86    |
| HAMD-15    | 0.39      | 0.53    | 0.25      | 0.62    |
| HAMD-16    | 3.81      | 0.051   | 1.45      | 0.23    |
| HAMD-17    | 0.40      | 0.53    | 1.13      | 0.29    |

**Supplementary Table 4 | Responsiveness of EEG-connectivity subtypes to rTMS treatment, assessed by linear mixed models (group x time interaction) with item-level BDI scores for dataset 4.**

| BDI items | All Patients |         | 10 Hz rTMS at left DLPFC |         | 1 Hz rTMS at right DLPFC |         |
|-----------|--------------|---------|--------------------------|---------|--------------------------|---------|
|           | F value      | p value | F value                  | p value | F value                  | p value |
| BDI-1     | 4.22         | 0.041   | 5.16                     | 0.025   | 0.97                     | 0.32    |
| BDI-2     | 1.74         | 0.19    | 3.43                     | 0.066   | 0.00002                  | 0.99    |
| BDI-3     | 7.80         | 0.0055  | 2.71                     | 0.10    | 5.01                     | 0.026   |
| BDI-4     | 0.043        | 0.83    | 0.29                     | 0.59    | 0.012                    | 0.91    |
| BDI-5     | 0.61         | 0.44    | 0.038                    | 0.85    | 1.08                     | 0.30    |
| BDI-6     | 3.31         | 0.070   | 0.62                     | 0.43    | 2.33                     | 0.13    |
| BDI-7     | 0.071        | 0.79    | 0.31                     | 0.58    | 0.015                    | 0.90    |
| BDI-8     | 0.055        | 0.81    | 0.37                     | 0.55    | 0.72                     | 0.40    |
| BDI-9     | 0.24         | 0.63    | 0.28                     | 0.59    | 0.044                    | 0.83    |
| BDI-10    | 2.98         | 0.085   | 1.81                     | 0.18    | 1.33                     | 0.25    |
| BDI-11    | 0.012        | 0.91    | 0.081                    | 0.78    | 0.043                    | 0.84    |
| BDI-12    | 4.86         | 0.028   | 6.01                     | 0.016   | 0.83                     | 0.36    |
| BDI-13    | 0.82         | 0.37    | 3.55                     | 0.062   | 8.25                     | 0.0046  |
| BDI-14    | 0.57         | 0.45    | 3.43                     | 0.067   | 0.55                     | 0.46    |
| BDI-15    | 0.79         | 0.38    | 1.0                      | 0.32    | 0.025                    | 0.88    |
| BDI-16    | 0.068        | 0.80    | 0.22                     | 0.64    | 0.11                     | 0.74    |
| BDI-17    | 0.018        | 0.89    | 0.21                     | 0.65    | 0.26                     | 0.61    |
| BDI-18    | 0.053        | 0.82    | 1.04                     | 0.31    | 1.11                     | 0.29    |
| BDI-19    | 0.0020       | 0.96    | 0.79                     | 0.37    | 0.27                     | 0.61    |
| BDI-20    | 0.090        | 0.76    | 0.31                     | 0.58    | 0.023                    | 0.88    |
| BDI-21    | 0.067        | 0.80    | 1.17                     | 0.28    | 0.27                     | 0.61    |

**Supplementary Table 5 | Demographic characteristics and clinical variables of PTSD study dataset 1.**  
 Statistics reflect comparisons of PTSD and TEHC groups.

| Categorical variables           | PTSD<br>(N = 106) | TEHC<br>(N = 95) | X <sup>2</sup> value | p value |
|---------------------------------|-------------------|------------------|----------------------|---------|
| Males, No. (%)                  | 96 (90.6)         | 85 (89.5)        | 0.07                 | 0.80    |
| Site distribution, % Stanford   | 32 (30.2)         | 36 (37.9)        | 1.33                 | 0.25    |
| Continuous variables, mean (SD) |                   |                  | t value              | p value |
| Age, yr                         | 34.1 (7.6)        | 32.6 (8.1)       | 1.31                 | 0.19    |
| Educational attainment, yr      | 15.3 (2.3)        | 15.6 (2.1)       | -0.89                | 0.37    |
| CAPS-5 total score              | 27.2 (10.6)       | 2.7 (3.6)        | 18.19                | < .001  |
| CAPS-5 subscale B score         | 6.2 (3.3)         | 0.5 (1.1)        | 13.83                | < .001  |
| CAPS-5 subscale C score         | 3.6 (1.7)         | 0.2 (0.9)        | 15.09                | < .001  |
| CAPS-5 subscale D score         | 8.8 (5.2)         | 0.4 (1.0)        | 13.15                | < .001  |
| CAPS-5 subscale E score         | 8.5 (3.5)         | 1.6 (2.2)        | 14.22                | < .001  |
| WHOQOL Physical score           | 20.9 (4.7)        | 27.4 (3.6)       | -9.96                | < .001  |
| WHOQOL Psychological score      | 13.9 (4.6)        | 19.7 (3.7)       | -8.89                | < .001  |
| WHOQOL Social score             | 5.9 (2.8)         | 8.1 (2.6)        | -5.37                | < .001  |
| WHOQOL Environment score        | 18.5 (5.0)        | 23.8 (4.3)       | -7.33                | < .001  |
| BDI total score                 | 18.3 (11.6)       | 3.5 (6.2)        | 8.99                 | < .001  |

Note. CAPS = Clinician-administered PTSD Scale, WHOQOL = World Health Organization Quality-of-life Scale, BDI = Beck Depression Inventory. See Supplementary Table 9 for more details of the clinical scale information.

**Supplementary Table 6 | Baseline demographic characteristics and clinical variables of PTSD study dataset 2.** Statistics reflect comparisons of the PE and CPT arms.

| Categorical variables           | PTSD (PE)<br>(N = 44) | PTSD (CPT)<br>(N = 91) | X <sup>2</sup> value | p value |
|---------------------------------|-----------------------|------------------------|----------------------|---------|
| Males, No. (%)                  | 37 (84.1)             | 75 (82.4)              | 0.06                 | 0.81    |
| Continuous variables, mean (SD) |                       |                        | t value              | p value |
| Age, yr                         | 47.2 (13.9)           | 44.1 (13.1)            | 1.24                 | 0.22    |
| Educational attainment, yr      | 15.0 (1.6)            | 14.8 (1.9)             | 0.74                 | 0.46    |
| CAPS-IV total score             | 65.6 (20.0)           | 72.6 (18.2)            | -1.96                | 0.05    |
| CAPS-IV subscale B score        | 16.7 (6.8)            | 19.2 (7.6)             | -1.97                | 0.05    |
| CAPS-IV subscale C score        | 25.5 (10.2)           | 29.3 (8.9)             | -2.14                | 0.03    |
| CAPS-IV subscale D score        | 23.5 (6.1)            | 24.1 (5.6)             | -0.55                | 0.58    |
| CASP-5 total score              | 37.2 (11.6)           | 40.0 (10.3)            | -1.36                | 0.18    |
| CAPS-5 subscale B score         | 8.6 (3.5)             | 9.4 (3.7)              | -1.20                | 0.24    |
| CAPS-5 subscale C score         | 4.1 (1.8)             | 4.3 (1.9)              | -0.61                | 0.54    |
| CAPS-5 subscale D score         | 13.7 (5.3)            | 15.2 (4.9)             | -1.55                | 0.13    |
| CAPS-5 subscale E score         | 10.8 (3.3)            | 11.2 (3.0)             | -0.58                | 0.56    |
| WHOQOL Physical score           | 20.8 (4.5)            | 20.6 (5.7)             | 0.23                 | 0.82    |
| WHOQOL Psychological score      | 16.7 (4.0)            | 15.2 (4.4)             | 1.63                 | 0.11    |
| WHOQOL Social score             | 6.5 (1.8)             | 5.6 (1.9)              | 2.18                 | 0.03    |
| WHOQOL Environment score        | 28.4 (5.7)            | 27.9 (5.4)             | 0.37                 | 0.71    |
| BDI total score                 | 21.5 (9.1)            | 24.3 (10.3)            | -1.51                | 0.13    |

Note. CAPS = Clinician-administered PTSD Scale, WHOQOL = World Health Organization Quality-of-life Scale, BDI = Beck Depression Inventory. See Supplementary Table 9 for more details of the clinical scale information.

**Supplementary Table 7 | Baseline demographic characteristics and clinical variables of depression study dataset 3.** Statistics reflect comparisons of the Sertraline and Placebo arms.

| Categorical variables            | Sertraline<br>(N = 109) | Placebo<br>(N = 119) | X <sup>2</sup> value | p value |
|----------------------------------|-------------------------|----------------------|----------------------|---------|
| Males, No. (%)                   | 30 (27.5)               | 48 (40.3)            | 4.15                 | 0.04    |
| Continuous variables, mean (SD)  |                         |                      | t value              | p value |
| Age, yr                          | 37.1 (13.9)             | 38.4 (12.6)          | -0.77                | 0.44    |
| Age of onset                     | 16.4 (5.9)              | 15.9 (5.6)           | 0.55                 | 0.59    |
| Educational attainment, yr       | 15.1 (2.6)              | 15.4 (2.6)           | -0.87                | 0.38    |
| Number of MDE                    | 30.8 (121.3)            | 45.4 (160.2)         | -0.77                | 0.44    |
| Duration of current episode (mo) | 42.7 (74.6)             | 51.9 (117.9)         | -0.70                | 0.49    |
| HAMD <sub>17</sub>               | 18.2 (4.7)              | 18.7 (4.4)           | -0.94                | 0.35    |
| Medication dose                  | 103.5 (32.3)            | 108.7 (29.7)         | -1.18                | 0.24    |
| QIDS                             | 18.7 (4.7)              | 17.8 (2.7)           | 2.28                 | 0.02    |
| MASQ GD score                    | 33.1 (7.6)              | 32.1 (8.3)           | 0.91                 | 0.37    |
| MASQ AD score                    | 44.0 (4.3)              | 43.9 (5.9)           | 0.15                 | 0.88    |
| MASQ AA score                    | 18.1 (5.8)              | 17.4 (5.2)           | 0.97                 | 0.34    |

Note. MDE = major depression episodes, MASQ = Mood and Anxiety Symptoms Questionnaire; \*4 MDD participants (1 placebo, and 3 with sertraline) with no employment status. See Supplementary Table 9 for more details of the clinical scale information.

**Supplementary Table 8 | Baseline demographic characteristics and clinical variables of depression study dataset 4.**

| Characteristic                    | MDD<br>(N = 179) |
|-----------------------------------|------------------|
| Age, mean (SD)                    | 43.3 (13.0)      |
| Males, No. (%)                    | 90 (50.3)        |
| Educational attainment, mean (SD) | 14.1 (4.0)       |
| <b>Clinical Assessments</b>       |                  |
| rTMS protocol                     |                  |
| 10 Hz Left aMFG, No. (%)          | 73 (40.8)        |
| 1Hz Right aMFG, No. (%)           | 106 (59.2)       |
| BDI total score, mean (SD)        | 30.6 (9.7)       |
| DASS-A, mean (SD)                 | 28.4 (9.8)       |
| DASS-D, mean (SD)                 | 13.6 (8.7)       |
| DASS-S, mean (SD)                 | 22.4 (10.5)      |

Note. BDI = Beck Depression Inventory, DASS = Depression, Anxiety and Stress Scale. See Supplementary Table 9 for more details of the clinical scale information.

**Supplementary Table 9 | Clinical scales used in the study.**

| Domain           | Questionnaire                                                                         | Description and measures derived                                                                                                                                                                                                                                                                    |
|------------------|---------------------------------------------------------------------------------------|-----------------------------------------------------------------------------------------------------------------------------------------------------------------------------------------------------------------------------------------------------------------------------------------------------|
| PTSD             | Clinician Administered PTSD Scale (CAPS) for DSM IV and DSM 5 past month <sup>3</sup> | Structured clinical interview. Sum of scores for each cluster: Criterion B: Re-experiencing; Criterion C: Avoidance; Criterion D: Negative alterations in cognitions and mood; Criterion E: Alterations in arousal and reactivity; Foreshortened Future (CAPS IV only); and Past month total score. |
|                  | PTSD Checklist (PCL) for DSM IV and DSM 5 <sup>4</sup>                                | Self-report questionnaire assessing the DSM IV and 5 symptoms of PTSD added up to one total score.                                                                                                                                                                                                  |
| Quality of life  | WHO Quality of Life Brief questionnaire (WHO-QOL-BREF) <sup>5</sup>                   | Self-report questionnaire. Scores are derived for 4 subscales: physical, psychological, social, environmental and a measure of overall quality of life.                                                                                                                                             |
| Depression       | Beck Depression Inventory – II (BDI-II) <sup>6</sup>                                  | Self-report questionnaire. Items added up to one total score.                                                                                                                                                                                                                                       |
|                  | Hamilton Depression Rating Scale (HAM-D) <sup>7</sup>                                 | Clinician administered rating scale. Items added up to one total scores.                                                                                                                                                                                                                            |
|                  | Quick Inventory of Depressive Symptoms (QIDS-SR-16) <sup>8</sup>                      | Self-report questionnaire. Items added up to one total scores.                                                                                                                                                                                                                                      |
|                  | Depression Anxiety Stress Scales short version (DASS-21) <sup>9</sup>                 | Self-report questionnaire. Scores are derived for 3 sub-scales: depression (DASS-D), anxiety (DASS-A), and stress (DASS-S).                                                                                                                                                                         |
| Mood and Anxiety | Mood and Anxiety Symptom Questionnaire (MASQ) <sup>10</sup>                           | Self-report questionnaire. Scores are derived for 3 subscales: General distress (GD), Anxious Arousal (AA), Anhedonic Depression (AD)                                                                                                                                                               |



## **Statement | Difference between the current findings and our prior reports.**

Using resting EEG from dataset 1, we recently established the power envelope connectivity (PEC) method to study the difference in brain connectome profile between PTSD patients and healthy controls<sup>11</sup>. Robust PTSD-related abnormalities were evident in theta-band source-space PEC features and were found to relate to cognitive deficits in these patients. The results from the prior study inspired us to use PEC features measured by EEG, a less expensive but more practical technique, to investigate the intrinsic neurophysiological subtypes. However, the PEC features identified in this study both do not overlap with those in the prior study, and do not differentiate between groups when not considering subtypes. That is, the present manuscript is the corollary of the traditional case-control approach taken in the prior paper.

In another recent paper, we reported on a new computational model, called SELSER<sup>12</sup>, tailored for sensor-space EEG and applied it to predict outcome with antidepressant sertraline versus placebo. The SELSER model identified a sertraline-predictive brain signature in major depression (using dataset 3). This method was designed specifically to predict the change in HAMD<sub>17</sub> clinical score by training a supervised regression model with a known target, and hence differed fundamentally from the unsupervised clustering method presented in our current study. Indeed, the present manuscript and the SELSER paper can be seen as complementary approaches with the prior paper taking a top-down supervised approach and the current one taking a bottom-up unsupervised approach, with both converging on the ability of EEG to predict antidepressant outcome relative to placebo. This convergence, given the large differences in both EEG features (power versus connectivity) and analytic method, speaks to the robustness of the underlying biological findings.

Though these prior reports provided strong support for our current hypothesis about source-space PEC-driven subtypes predictive of different treatments across psychiatric populations, we have studied multiple crucial and challenging issues in the present manuscript. Specifically, we have made the following unique contributions, showing the fundamental differences from the prior reports: (1) Developed a purely data-driven, robust and replicated parcellation of psychiatric phenotypes based only on brain data. The newly designed method provided us an elegant way to characterize the intrinsic data structure and delineate the underlying neurophysiological subtypes for patient stratification; (2) Validated the ability of the identified neurophysiological subtypes in outcome prediction across multiple treatments, including replication of the psychotherapy prediction effect (with a strong effect size), demonstrating their transdiagnostic potential; (3) Established EEG connectivity as a clinically-useful tool for clinical care and drug development in the near term by identifying a previously unknown (but now identified and validated) brain phenotype using a clinic-translatable tool.

## References

1. Tipping, M.E. Sparse Bayesian learning and the relevance vector machine. *Journal of Machine Learning Research* **1**, 211-244 (2001).
2. Zhang, Y., *et al.* Sparse Bayesian classification of EEG for brain-computer interface. *IEEE Transactions on Neural Networks and Learning Systems* **27**, 2256-2267 (2016).
3. Weathers, F.W., *et al.* The Clinician-Administered PTSD Scale for DSM-5 (CAPS-5): Development and initial psychometric evaluation in military veterans. (2017).
4. Blevins, C.A., Weathers, F.W., Davis, M.T., Witte, T.K. & Domino, J.L. The posttraumatic stress disorder checklist for DSM-5 (PCL-5): Development and initial psychometric evaluation. *Journal of Traumatic Stress* **28**, 489-498 (2015).
5. Skevington, S.M., Lofy, M. & O'Connell, K. The World Health Organization's WHOQOL-BREF quality of life assessment: psychometric properties and results of the international field trial. A report from the WHOQOL group. *Quality of life Research* **13**, 299-310 (2004).
6. Beck, A.T., Steer, R.A. & Brown, G.K. Beck depression inventory-II. *San Antonio* **78**, 490-498 (1996).
7. Hamilton, M. A rating scale for depression. *Journal of neurology, neurosurgery, and psychiatry* **23**, 56 (1960).
8. Rush, A.J., *et al.* The 16-Item Quick Inventory of Depressive Symptomatology (QIDS), clinician rating (QIDS-C), and self-report (QIDS-SR): a psychometric evaluation in patients with chronic major depression. *Biological Psychiatry* **54**, 573-583 (2003).
9. Lovibond, S.H. & Lovibond, P.F. *Manual for the depression anxiety stress scales*, (Psychology Foundation of Australia, 1996).
10. Watson, D., *et al.* Testing a tripartite model: II. Exploring the symptom structure of anxiety and depression in student, adult, and patient samples. *Journal of Abnormal Psychology* **104**, 15 (1995).
11. Toll, R., *et al.* An electroencephalography connectomic profile of post-traumatic stress disorder. *American Journal of Psychiatry* **177**, 233-243 (2020).
12. Wu, W., *et al.* An electroencephalographic signature predicts antidepressant response in major depression. *Nature Biotechnology* **38**, 439-447 (2020).
